# Supplementary material for: Autonomic Nervous System Responses to Viewing Green and Built Settings: Differentiating Between Sympathetic and Parasympathetic Activity
Source: MDPI journal article supplement (doi:10.3390/ijerph121215026), 2015-12-14
Supplement: s1 [file s1]

# Autonomic Nervous System Responses to Viewing Green and Built Settings: Differentiating Between Sympathetic and Parasympathetic Activity

**Table S1.** Mean RSA (with SD) during the 11 blocks.

|                             | B0    | First Phase |      |      |       |       | Second Phase |      |      |       |      |
|-----------------------------|-------|-------------|------|------|-------|-------|--------------|------|------|-------|------|
| Condition/order             | B0    | B1          | B2   | B3   | B4    | B5    | B1           | B2   | B3   | B4    | B5   |
| <b>Green-Built <i>M</i></b> | 94.8  | 80.2        | 98.5 | 73.5 | 101.4 | 100.1 | 87.4         | 94.9 | 75.4 | 99.0  | 99.3 |
| <b><i>SD</i></b>            | 44.8  | 34.3        | 54.8 | 27.1 | 59.1  | 55.2  | 37.5         | 48.5 | 26.1 | 50.6  | 50.0 |
| <b>Built-Green <i>M</i></b> | 108.7 | 83.6        | 97.9 | 79.4 | 100.8 | 95.2  | 90.4         | 91.4 | 86.4 | 103.6 | 98.7 |
| <b><i>SD</i></b>            | 54.3  | 38.5        | 49.6 | 38.3 | 53.4  | 54.3  | 39.3         | 45.3 | 38.3 | 50.0  | 46.4 |

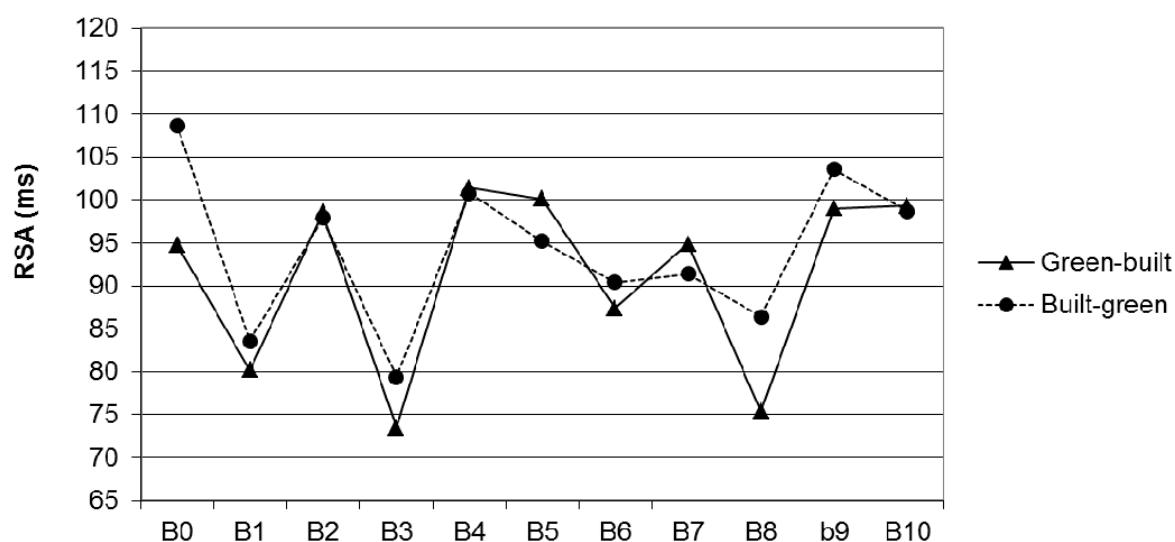

**Figure S1.** Mean RSA (msec.) in the 11 blocks of the experiment.

**Table S2.** Mean PEP (with SD) during the 11 blocks.

|                             | B0    | First Phase |       |       |       |       | Second Phase |       |       |       |       |
|-----------------------------|-------|-------------|-------|-------|-------|-------|--------------|-------|-------|-------|-------|
| Condition/Order             | B0    | B1          | B2    | B3    | B4    | B5    | B1           | B2    | B3    | B4    | B5    |
| <b>Green-Built <i>M</i></b> | 111.1 | 110.8       | 113.0 | 109.2 | 114.0 | 113.6 | 113.1        | 113.7 | 112.7 | 113.2 | 113.2 |
| <b><i>SD</i></b>            | 20.8  | 21.8        | 19.1  | 22.2  | 20.3  | 19.3  | 20.0         | 20.0  | 20.1  | 17.8  | 16.9  |
| <b>Built-Green <i>M</i></b> | 107.1 | 106.9       | 109.8 | 105.3 | 111.2 | 111.8 | 110.8        | 111.5 | 111.5 | 112.9 | 113.0 |
| <b><i>SD</i></b>            | 17.2  | 16.2        | 17.2  | 18.9  | 15.4  | 15.7  | 16.6         | 17.4  | 17.4  | 16.4  | 15.8  |

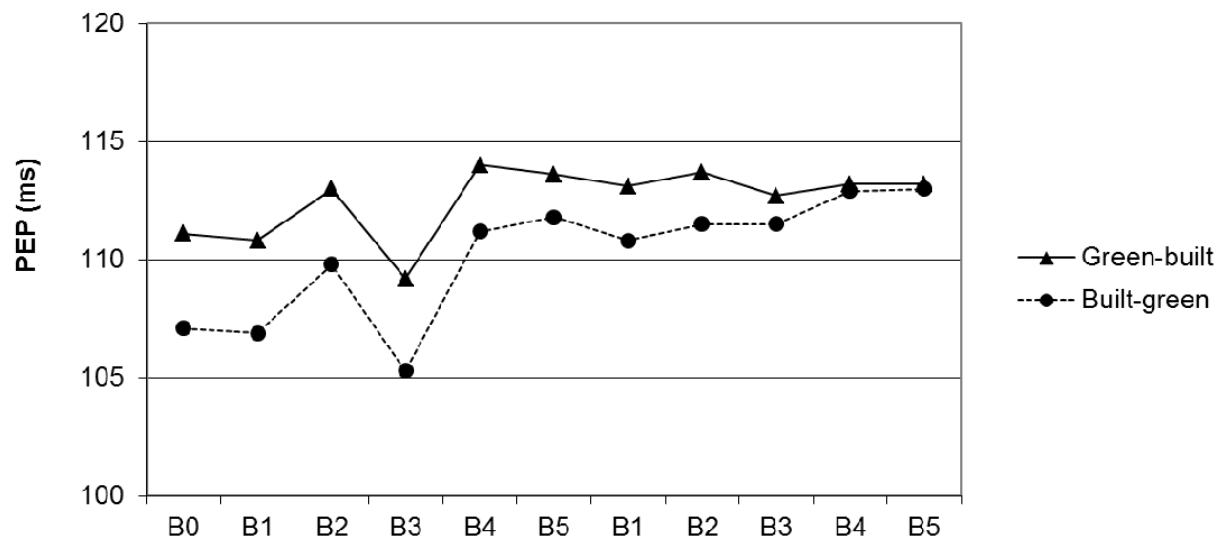

**Figure S2.** Mean PEP (msec.) in the 11 blocks of the experiment.

© 2015 by the authors; licensee MDPI, Basel, Switzerland. This article is an open access article distributed under the terms and conditions of the Creative Commons Attribution license (<http://creativecommons.org/licenses/by/4.0/>).
